# Supplementary material for: Social behaviour shapes hypothalamic neural ensemble representations of conspecific sex
Source: Springer Nature journal article supplement (doi:10.1038/nature23885), 2017-10-01
Supplement: 41586_2017_BFnature23885_MOESM2_ESM.pdf [file 41586_2017_BFnature23885_MOESM2_ESM.pdf]

## Supplementary Information

**Table 1: Statistical significance testing**

All statistical tests are two-sided t-tests unless otherwise mentioned.

| Figure         | Panel               | Identifier                 | p-value         | Statistical test                                             |
|----------------|---------------------|----------------------------|-----------------|--------------------------------------------------------------|
| Figure 2       | c1                  | ***                        | p<1e-4          |                                                              |
|                |                     | *                          | p=2.7e-2        |                                                              |
|                | c2                  | ***                        | p<1e-4          |                                                              |
|                |                     | **                         | p=1.6e-3        |                                                              |
|                |                     | *                          | p=1.5e-2        |                                                              |
|                | i                   | attack vs all              | p=1.8e-12       | χ <sup>2</sup> test                                          |
| sniff ♀ vs all |                     | p=8.2e-6                   |                 |                                                              |
| J              | attack ♂ vs mount ♀ | p=0.0047                   |                 |                                                              |
|                | attack ♂ vs sniff ♂ | p=0.0023                   |                 |                                                              |
|                | attack ♂ vs sniff ♀ | p<0.0001                   |                 |                                                              |
| Figure 3       | e                   | ** trial 4                 | p=3.3e-3        | post-hoc Bonferroni test; corrected for multiple comparisons |
|                |                     | ** trial 5                 | p=3.2e-3        |                                                              |
|                |                     | **** trial 1 (day 2)       | p=3.58e-8       |                                                              |
|                |                     | **** all subsequent trials | p<1e-8          |                                                              |
| Figure 4       | e                   | ****                       | p=9.6e-10       | one-way ANOVA                                                |
|                |                     |                            |                 |                                                              |
|                | g                   | **** (mouse 9)             | p=3.3e-5        | one-way ANOVA                                                |
|                |                     | * (mouse 9)                | p=0.016         |                                                              |
|                |                     | **** (mouse 10)            | p=6.1e-5        |                                                              |
|                |                     | * (mouse 10)               | p=0.019         |                                                              |
|                | i                   | **                         | p=2.7e-3        |                                                              |
|                |                     | n.s.                       | not significant |                                                              |
|                | n                   | **** (mouse 26)            | p=9.6e-4        |                                                              |
|                |                     | **** (mouse 28)            | p=3.5e-7        |                                                              |
| ** (mouse 28)  |                     | p=0.0046                   |                 |                                                              |
| * (mouse 28)   |                     | p=0.032                    |                 |                                                              |
| o              | n.s.                | not significant            |                 |                                                              |
